# Supplementary material
Source: MDPI journal article supplement (https://www.mdpi.com/2073-4395/13/2/311)
Supplement: s1 [file s1]

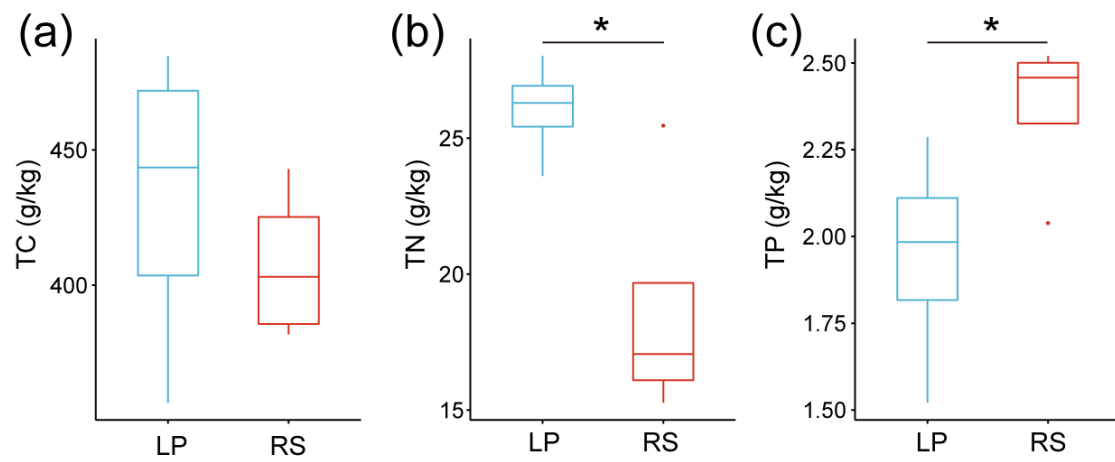

Figure S1: Nutrient contents of the cover crops. Boxplot displaying variation in TC content (a), TN content (b), and TP content (c) between different cover crops (\*,  $p < 0.05$ ).

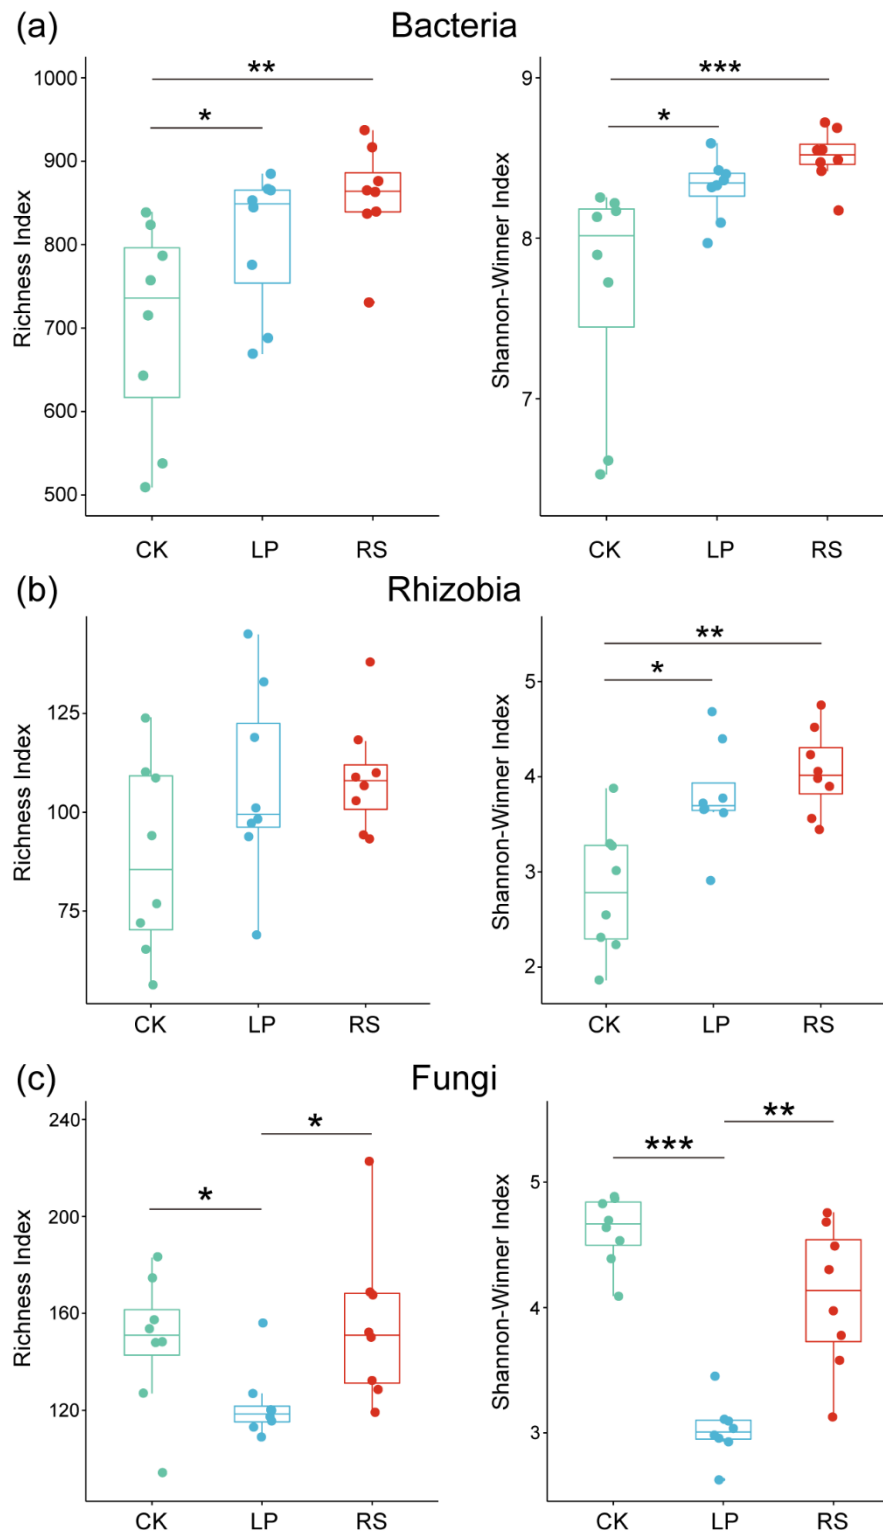

Figure S2: Diversity indices of peanut rhizosphere soil microbes as affected by cover crops. Boxplot displaying variation in bacterial diversity (a), rhizobial diversity (b), and fungal diversity (c) among different cover crop treatments (\*,  $p < 0.05$ ; \*\*,  $p < 0.01$ ; \*\*\*,  $p < 0.001$ ).

(a) Bacteria

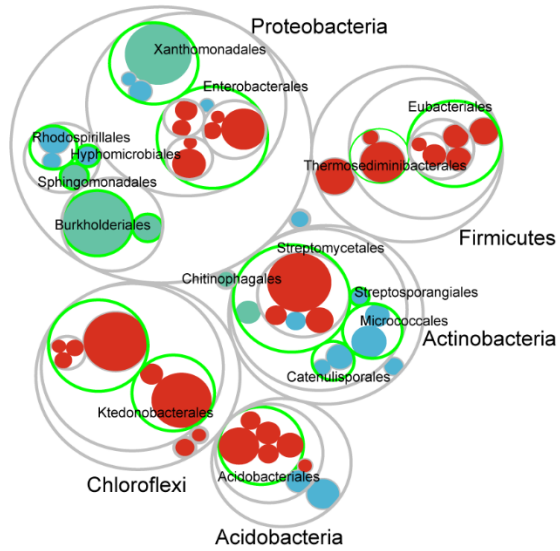

(b) Rhizobia

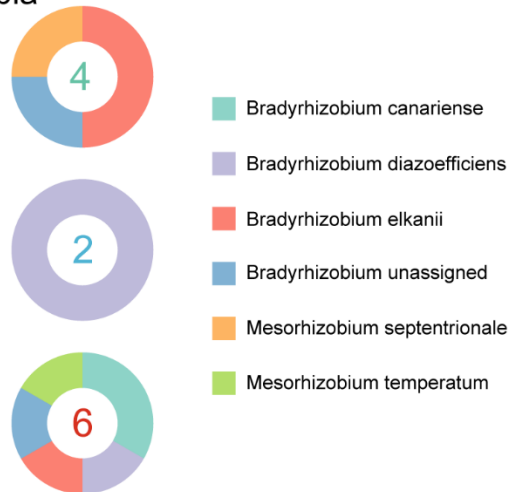

(c) Fungi

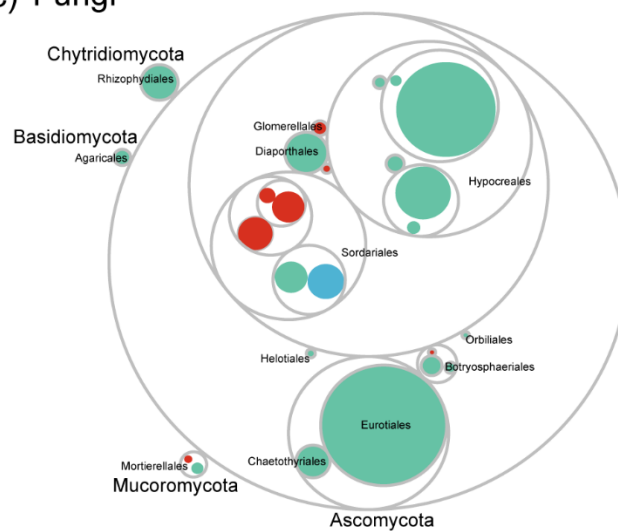

Figure S3: Composition of bacterial (a), rhizobial (b), and fungal (c) indicator species.

Table S1: PCR information.

|          | Primers                                                                                     | Reaction system                                                                                                                                                                                | Cycling parameters                                                                                                                            |
|----------|---------------------------------------------------------------------------------------------|------------------------------------------------------------------------------------------------------------------------------------------------------------------------------------------------|-----------------------------------------------------------------------------------------------------------------------------------------------|
| Bacteria | 515F (5'-GTGCCAGCMGCCGCGGTAA-3')/907R (5'-CCGTCAATTCCTTTGAGTTT-3')                          | A 25 µl reaction containing 12.5 µl SYBR®Premix Ex Taq (Takara), 0.5 µl PCR forward and reverse primer (both 10 µM), 2 µl DNA template, and 9.5 µl double distilled water (ddH <sub>2</sub> O) | Pre-denaturation at 95 °C for 3 min, with 27 cycles of 95 °C for 30 s, 55 °C for 30 s, and 72 °C for 45 s, and extension at 72 °C for 10 min  |
| Rhizobia | <i>rpoB</i> 1479F (5'-GATCGAAACGCCGGAAGG-3')/ <i>rpoB</i> 1831R (5'-TGCATG TTCGAG CCCAT-3') |                                                                                                                                                                                                | Pre-denaturation at 95 °C for 5 min, with 30 cycles of 94 °C for 30 s, 60 °C for 45 s, and 72 °C for 1 min, and extension at 72 °C for 10 min |
| Fungi    | ITS1F (5'-CTTGGTCATTTAGAGGAAGTAA-3')/ITS2R (5'-GCTGCGTTCTTCATCGATGC-3')                     |                                                                                                                                                                                                | Pre-denaturation at 95 °C for 3 min, with 35 cycles of 95 °C for 30 s, 55 °C for 30 s, and 72 °C for 45 s, and extension at 72 °C for 10 min  |

Table S2: Effect of different cover crops on peanut biomass, nitrogen content, and nitrogen uptake.

| Treatment | Biomass of<br>peanut straw | Biomass of<br>peanut pod | N content of<br>peanut straw | N content of<br>peanut pod | N uptake of<br>peanut     |
|-----------|----------------------------|--------------------------|------------------------------|----------------------------|---------------------------|
|           | (g plant <sup>-1</sup> )   |                          | (mg g <sup>-1</sup> )        |                            | (mg plant <sup>-1</sup> ) |
| CK        | 16.67±3.13a                | 11.80±1.18b              | 16.28±1.89a                  | 28.38±1.67b                | 605.23±52.41c             |
| LP        | 16.36±2.77a                | 12.64±1.31ab             | 17.01±1.57a                  | 32.04±2.25a                | 681.39±40.58b             |
| RS        | 17.73±1.10a                | 13.57±0.65a              | 16.92±2.05a                  | 34.08±1.22a                | 762.03±58.55a             |

Table S3: Core rhizosphere taxa.

| Taxa     | OTU ID | Kingdom  | Phylum         | Class               | Order             | Family                  | Genus                     |
|----------|--------|----------|----------------|---------------------|-------------------|-------------------------|---------------------------|
| Bacteria | 1      | Bacteria | Bacteroidetes  | Chitinophagia       | Chitinophagales   | Chitinophagaceae        | <i>Sediminibacterium</i>  |
|          | 3      | Bacteria | Proteobacteria | Gammaproteobacteria | Xanthomonadales   | Rhodanobacteraceae      | <i>Metallibacterium</i>   |
|          | 6      | Bacteria | Proteobacteria | Gammaproteobacteria | Xanthomonadales   | Rhodanobacteraceae      | <i>Metallibacterium</i>   |
|          | 7      | Bacteria | Chloroflexi    | Ktedonobacteria     | Ktedonobacterales | Ktedonosporobacteraceae | <i>Ktedonosporobacter</i> |
|          | 8      | Bacteria | Chloroflexi    | Ktedonobacteria     | Ktedonobacterales | Ktedonobacteraceae      | <i>Ktedonobacter</i>      |
|          | 9      | Bacteria | Actinobacteria | Actinomycetia       | Streptomycetales  | Streptomycetaceae       | <i>Streptomyces</i>       |
|          | 10     | Bacteria | Chloroflexi    | Ktedonobacteria     | Ktedonobacterales | Dictyobacteraceae       | <i>Dictyobacter</i>       |
|          | 11     | Bacteria | Chloroflexi    | Ktedonobacteria     | Ktedonobacterales | Dictyobacteraceae       | <i>Tengunoibacter</i>     |
|          | 12     | Bacteria | Proteobacteria | Gammaproteobacteria | Enterobacterales  | Enterobacteriaceae      | <i>Escherichia</i>        |

|      | 13     | Bacteria | Actinobacteria | Actinomycetia       | Streptomycetales         | Streptomycetaceae      | <i>Streptomyces</i>      |
|------|--------|----------|----------------|---------------------|--------------------------|------------------------|--------------------------|
|      | 14     | Bacteria | Actinobacteria | Actinomycetia       | Streptosporangiales      | Thermomonosporaceae    | <i>Actinocorallia</i>    |
|      | 16     | Bacteria | Proteobacteria | Gammaproteobacteria | Enterobacterales         | Enterobacteriaceae     | Unassigned               |
|      | 17     | Bacteria | Actinobacteria | Actinomycetia       | Micrococcales            | Micrococcaceae         | <i>Sinomonas</i>         |
|      | 18     | Bacteria | Firmicutes     | Clostridia          | Thermosediminibacterales | Tepidanaerobacteraceae | <i>Tepidanaerobacter</i> |
|      | 20     | Bacteria | Actinobacteria | Actinomycetia       | Micrococcales            | Micrococcaceae         | <i>Sinomonas</i>         |
|      | 21     | Bacteria | Proteobacteria | Gammaproteobacteria | Xanthomonadales          | Rhodanobacteraceae     | <i>Rhodanobacter</i>     |
|      | 22     | Bacteria | Proteobacteria | Alphaproteobacteria | Hyphomicrobiales         | Beijerinckiaceae       | <i>Methylovirgula</i>    |
|      | 24     | Bacteria | Proteobacteria | Gammaproteobacteria | Enterobacterales         | Enterobacteriaceae     | <i>Escherichia</i>       |
| Taxa | OTU ID | Kingdom  | Phylum         | Class               | Order                    | Family                 | Genus                    |
|      | 25     | Bacteria | Proteobacteria | Alphaproteobacteria | Sphingomonadales         | Sphingomonadaceae      | <i>Sphingomonas</i>      |
|      | 27     | Bacteria | Actinobacteria | Actinomycetia       | Micrococcales            | Microbacteriaceae      | <i>Cnuibacter</i>        |

|    |          |                |                     |                     |                         |                              |
|----|----------|----------------|---------------------|---------------------|-------------------------|------------------------------|
| 28 | Bacteria | Proteobacteria | Gammaproteobacteria | Xanthomonadales     | Rhodanobacteraceae      | <i>Metallibacterium</i>      |
| 29 | Bacteria | Acidobacteria  | Acidobacteriia      | Acidobacteriales    | Acidobacteriaceae       | <i>Candidatus Koribacter</i> |
| 30 | Bacteria | Proteobacteria | Gammaproteobacteria | Enterobacterales    | Enterobacteriaceae      | <i>Salmonella</i>            |
| 31 | Bacteria | Proteobacteria | Gammaproteobacteria | Enterobacterales    | Enterobacteriaceae      | <i>Salmonella</i>            |
| 32 | Bacteria | Proteobacteria | Alphaproteobacteria | Sphingomonadales    | Sphingomonadaceae       | <i>Sphingomicrobium</i>      |
| 33 | Bacteria | Actinobacteria | Actinomycetia       | Streptomycetales    | Streptomycetaceae       | <i>Kitasatospora</i>         |
| 36 | Bacteria | Actinobacteria | Thermoleophilia     | Solirubrobacterales | Conexibacteraceae       | <i>Conexibacter</i>          |
| 37 | Bacteria | Actinobacteria | Actinomycetia       | Streptomycetales    | Streptomycetaceae       | <i>Streptomyces</i>          |
| 38 | Bacteria | Actinobacteria | Actinomycetia       | Corynebacteriales   | Mycobacteriaceae        | <i>Mycobacterium</i>         |
| 39 | Bacteria | Chloroflexi    | Ktedonobacteria     | Ktedonobacterales   | Ktedonosporobacteraceae | <i>Ktedonosporobacter</i>    |
| 40 | Bacteria | Proteobacteria | Gammaproteobacteria | Enterobacterales    | Enterobacteriaceae      | <i>Cronobacter</i>           |
| 41 | Bacteria | Acidobacteria  | Acidobacteriia      | Bryobacterales      | Bryobacteraceae         | <i>Bryobacter</i>            |



|      | 42     | Bacteria | Actinobacteria                 | Actinomycetia       | Catenulisporales  | Actinospicaceae    | <i>Actinospica</i>              |
|------|--------|----------|--------------------------------|---------------------|-------------------|--------------------|---------------------------------|
|      | 43     | Bacteria | Actinobacteria                 | Actinomycetia       | Streptomycetales  | Streptomycetaceae  | <i>Streptomyces</i>             |
|      | 44     | Bacteria | Proteobacteria                 | Gammaproteobacteria | Enterobacterales  | Enterobacteriaceae | Unassigned                      |
|      | 45     | Bacteria | Proteobacteria                 | Gammaproteobacteria | Enterobacterales  | Enterobacteriaceae | <i>Escherichia</i>              |
|      | 47     | Bacteria | Candidatus<br>Saccharibacteria | Unassigned          | Unassigned        | Unassigned         | <i>Candidatus Saccharimonas</i> |
| Taxa | OTU ID | Kingdom  | Phylum                         | Class               | Order             | Family             | Genus                           |
|      | 48     | Bacteria | Firmicutes                     | Bacilli             | Bacillales        | Bacillaceae        | <i>Geobacillus</i>              |
|      | 49     | Bacteria | Proteobacteria                 | Gammaproteobacteria | Xanthomonadales   | Rhodanobacteraceae | <i>Dyella</i>                   |
|      | 50     | Bacteria | Chloroflexi                    | Ktedonobacteria     | Ktedonobacterales | Dictyobacteraceae  | <i>Dictyobacter</i>             |
|      | 52     | Bacteria | Proteobacteria                 | Gammaproteobacteria | Enterobacterales  | Enterobacteriaceae | Unassigned                      |
|      | 53     | Bacteria | Proteobacteria                 | Alphaproteobacteria | Hyphomicrobiales  | Hyphomicrobiaceae  | <i>Rhodoplanes</i>              |
|      | 55     | Bacteria | Proteobacteria                 | Gammaproteobacteria | Enterobacterales  | Enterobacteriaceae | <i>Escherichia</i>              |

|    |          |                                |                     |                    |                     |                                 |
|----|----------|--------------------------------|---------------------|--------------------|---------------------|---------------------------------|
| 57 | Bacteria | Actinobacteria                 | Actinomycetia       | Pseudonocardiales  | Pseudonocardiaceae  | <i>Crossiella</i>               |
| 59 | Bacteria | Candidatus<br>Saccharibacteria | Unassigned          | Unassigned         | Unassigned          | <i>Candidatus Saccharimonas</i> |
| 61 | Bacteria | Proteobacteria                 | Deltaproteobacteria | Syntrophorhabdales | Syntrophorhabdaceae | <i>Syntrophorhabdus</i>         |
| 62 | Bacteria | Chloroflexi                    | Ktedonobacteria     | Ktedonobacterales  | Ktedonobacteraceae  | <i>Ktedonobacter</i>            |
| 63 | Bacteria | Proteobacteria                 | Alphaproteobacteria | Rhodospirillales   | Azospirillaceae     | <i>Skermanella</i>              |
| 64 | Bacteria | Proteobacteria                 | Alphaproteobacteria | Rhodospirillales   | Azospirillaceae     | <i>Azospirillum</i>             |
| 65 | Bacteria | Proteobacteria                 | Gammaproteobacteria | Enterobacterales   | Enterobacteriaceae  | Unassigned                      |
| 66 | Bacteria | Firmicutes                     | Unassigned          | Unassigned         | Unassigned          | Unassigned                      |
| 67 | Bacteria | Chloroflexi                    | Ktedonobacteria     | Ktedonobacterales  | Ktedonobacteraceae  | <i>Ktedonobacter</i>            |
| 68 | Bacteria | Firmicutes                     | Clostridia          | Eubacteriales      | Peptococcaceae      | <i>Candidatus Desulforudis</i>  |
| 69 | Bacteria | Acidobacteria                  | Acidobacteriia      | Acidobacteriales   | Acidobacteriaceae   | <i>Granulicella</i>             |
| 70 | Bacteria | Proteobacteria                 | Gammaproteobacteria | Enterobacterales   | Enterobacteriaceae  | <i>Klebsiella</i>               |

|      | 71     | Bacteria | Proteobacteria | Gammaproteobacteria | Enterobacterales    | Enterobacteriaceae  | <i>Cronobacter</i>      |
|------|--------|----------|----------------|---------------------|---------------------|---------------------|-------------------------|
| Taxa | OTU ID | Kingdom  | Phylum         | Class               | Order               | Family              | Genus                   |
|      | 72     | Bacteria | Chloroflexi    | Ktedonobacteria     | Ktedonobacterales   | Ktedonobacteraceae  | <i>Ktedonobacter</i>    |
|      | 73     | Bacteria | Actinobacteria | Actinomycetia       | Streptomycetales    | Streptomycetaceae   | <i>Streptomyces</i>     |
|      | 74     | Bacteria | Actinobacteria | Actinomycetia       | Acidothermales      | Acidothermaceae     | <i>Acidothermus</i>     |
|      | 75     | Bacteria | Actinobacteria | Actinomycetia       | Geodermatophilales  | Geodermatophilaceae | <i>Geodermatophilus</i> |
|      | 77     | Bacteria | Actinobacteria | Thermoleophilia     | Solirubrobacterales | Conexibacteraceae   | <i>Conexibacter</i>     |
|      | 78     | Bacteria | Firmicutes     | Clostridia          | Eubacteriales       | Unassigned          | Unassigned              |
|      | 80     | Bacteria | Actinobacteria | Actinomycetia       | Catenulisporales    | Catenulisporaceae   | <i>Catenulispora</i>    |
|      | 81     | Bacteria | Actinobacteria | Actinomycetia       | Catenulisporales    | Actinospicaceae     | <i>Actinospica</i>      |
|      | 82     | Bacteria | Unassigned     | Unassigned          | Unassigned          | Unassigned          | Unassigned              |
|      | 83     | Bacteria | Actinobacteria | Actinomycetia       | Streptomycetales    | Streptomycetaceae   | <i>Streptomyces</i>     |

|      | 85     | Bacteria | Chloroflexi    | Ktedonobacteria     | Ktedonobacterales | Ktedonobacteraceae | <i>Ktedonobacter</i>     |
|------|--------|----------|----------------|---------------------|-------------------|--------------------|--------------------------|
|      | 86     | Bacteria | Actinobacteria | Actinomycetia       | Catenulisporales  | Actinospicaceae    | <i>Actinospica</i>       |
|      | 87     | Bacteria | Actinobacteria | Actinomycetia       | Acidothermales    | Acidothermaceae    | <i>Acidothermus</i>      |
|      | 88     | Bacteria | Chloroflexi    | Ktedonobacteria     | Ktedonobacterales | Ktedonobacteraceae | <i>Ktedonobacter</i>     |
|      | 89     | Bacteria | Proteobacteria | Gammaproteobacteria | Enterobacterales  | Enterobacteriaceae | <i>Cronobacter</i>       |
|      | 90     | Bacteria | Chloroflexi    | Ktedonobacteria     | Ktedonobacterales | Dictyobacteraceae  | <i>Tengunoibacter</i>    |
|      | 92     | Bacteria | Chloroflexi    | Ktedonobacteria     | Ktedonobacterales | Ktedonobacteraceae | <i>Ktedonobacter</i>     |
|      | 93     | Bacteria | Chloroflexi    | Ktedonobacteria     | Ktedonobacterales | Ktedonobacteraceae | <i>Ktedonobacter</i>     |
|      | 94     | Bacteria | Bacteroidetes  | Chitinophagia       | Chitinophagales   | Chitinophagaceae   | <i>Sediminibacterium</i> |
| Taxa | OTU ID | Kingdom  | Phylum         | Class               | Order             | Family             | Genus                    |
|      | 96     | Bacteria | Actinobacteria | Actinomycetia       | Streptomycetales  | Streptomycetaceae  | <i>Streptomyces</i>      |
|      | 98     | Bacteria | Chloroflexi    | Ktedonobacteria     | Ktedonobacterales | Dictyobacteraceae  | <i>Tengunoibacter</i>    |

|     |          |                |                     |                     |                    |                              |
|-----|----------|----------------|---------------------|---------------------|--------------------|------------------------------|
| 100 | Bacteria | Actinobacteria | Thermoleophilia     | Solirubrobacterales | Conexibacteraceae  | <i>Conexibacter</i>          |
| 102 | Bacteria | Acidobacteria  | Acidobacteriia      | Acidobacteriales    | Acidobacteriaceae  | <i>Candidatus Koribacter</i> |
| 103 | Bacteria | Acidobacteria  | Acidobacteriia      | Acidobacteriales    | Acidobacteriaceae  | <i>Candidatus Koribacter</i> |
| 104 | Bacteria | Actinobacteria | Actinomycetia       | Streptomycetales    | Streptomycetaceae  | <i>Streptomyces</i>          |
| 107 | Bacteria | Proteobacteria | Alphaproteobacteria | Hyphomicrobiales    | Reyranellaceae     | <i>Reyranella</i>            |
| 108 | Bacteria | Proteobacteria | Gammaproteobacteria | Enterobacterales    | Enterobacteriaceae | <i>Cronobacter</i>           |
| 110 | Bacteria | Actinobacteria | Actinomycetia       | Streptomycetales    | Streptomycetaceae  | <i>Streptomyces</i>          |
| 111 | Bacteria | Actinobacteria | Thermoleophilia     | Solirubrobacterales | Conexibacteraceae  | <i>Conexibacter</i>          |
| 112 | Bacteria | Actinobacteria | Actinomycetia       | Catenulisporales    | Actinospicaceae    | <i>Actinospica</i>           |
| 113 | Bacteria | Firmicutes     | Clostridia          | Eubacteriales       | Peptococcaceae     | <i>Desulfofundulus</i>       |
| 115 | Bacteria | Proteobacteria | Gammaproteobacteria | Pseudomonadales     | Pseudomonadaceae   | <i>Pseudomonas</i>           |
| 116 | Bacteria | Actinobacteria | Actinomycetia       | Acidothermales      | Acidothermaceae    | <i>Acidothermus</i>          |

|      | 117    | Bacteria | Acidobacteria                  | Acidobacteriia      | Acidobacteriales       | Acidobacteriaceae       | <i>Occallatibacter</i>          |
|------|--------|----------|--------------------------------|---------------------|------------------------|-------------------------|---------------------------------|
|      | 118    | Bacteria | Candidatus<br>Saccharibacteria | Unassigned          | Unassigned             | Unassigned              | <i>Candidatus Saccharimonas</i> |
|      | 120    | Bacteria | Firmicutes                     | Clostridia          | Eubacteriales          | Peptococcaceae          | <i>Pelotomaculum</i>            |
|      | 121    | Bacteria | Proteobacteria                 | Gammaproteobacteria | Enterobacterales       | Enterobacteriaceae      | <i>Klebsiella</i>               |
|      | 122    | Bacteria | Chloroflexi                    | Ktedonobacteria     | Ktedonobacterales      | Ktedonobacteraceae      | <i>Ktedonobacter</i>            |
| Taxa | OTU ID | Kingdom  | Phylum                         | Class               | Order                  | Family                  | Genus                           |
|      | 123    | Bacteria | Chloroflexi                    | Ktedonobacteria     | Ktedonobacterales      | Thermosporotrichaceae   | <i>Thermosporothrix</i>         |
|      | 124    | Bacteria | Proteobacteria                 | Gammaproteobacteria | Enterobacterales       | Enterobacteriaceae      | Unassigned                      |
|      | 125    | Bacteria | Firmicutes                     | Clostridia          | Thermoanaerobacterales | Thermoanaerobacteraceae | Unassigned                      |
|      | 127    | Bacteria | Chloroflexi                    | Ktedonobacteria     | Ktedonobacterales      | Dictyobacteraceae       | <i>Tengunoibacter</i>           |
|      | 128    | Bacteria | Actinobacteria                 | Actinomycetia       | Catenulisporales       | Catenulisporaceae       | <i>Catenulispora</i>            |
|      | 129    | Bacteria | Proteobacteria                 | Gammaproteobacteria | Enterobacterales       | Enterobacteriaceae      | <i>Cronobacter</i>              |

|     |          |                                |                     |                   |                         |                                 |
|-----|----------|--------------------------------|---------------------|-------------------|-------------------------|---------------------------------|
| 131 | Bacteria | Proteobacteria                 | Gammaproteobacteria | Enterobacterales  | Enterobacteriaceae      | <i>Escherichia</i>              |
| 132 | Bacteria | Firmicutes                     | Clostridia          | Eubacteriales     | Peptococcaceae          | <i>Desulfohalotomaculum</i>     |
| 133 | Bacteria | Candidatus<br>Saccharibacteria | Unassigned          | Unassigned        | Unassigned              | <i>Candidatus Saccharimonas</i> |
| 134 | Bacteria | Chloroflexi                    | Ktedonobacteria     | Ktedonobacterales | Ktedonosporobacteraceae | <i>Ktedonosporobacter</i>       |
| 135 | Bacteria | Proteobacteria                 | Gammaproteobacteria | Enterobacterales  | Enterobacteriaceae      | <i>Cronobacter</i>              |
| 136 | Bacteria | Chloroflexi                    | Ktedonobacteria     | Ktedonobacterales | Ktedonobacteraceae      | <i>Ktedonobacter</i>            |
| 138 | Bacteria | Proteobacteria                 | Gammaproteobacteria | Enterobacterales  | Enterobacteriaceae      | <i>Cronobacter</i>              |
| 140 | Bacteria | Chloroflexi                    | Ktedonobacteria     | Ktedonobacterales | Ktedonobacteraceae      | <i>Ktedonobacter</i>            |
| 141 | Bacteria | Chloroflexi                    | Ktedonobacteria     | Ktedonobacterales | Ktedonobacteraceae      | <i>Ktedonobacter</i>            |
| 144 | Bacteria | Proteobacteria                 | Gammaproteobacteria | Enterobacterales  | Enterobacteriaceae      | Unassigned                      |
| 148 | Bacteria | Chloroflexi                    | Ktedonobacteria     | Ktedonobacterales | Dictyobacteraceae       | <i>Tengunoibacter</i>           |
| 149 | Bacteria | Actinobacteria                 | Actinomycetia       | Micrococcales     | Microbacteriaceae       | <i>Leifsonia</i>                |

|      | 150    | Bacteria | Actinobacteria | Actinomycetia       | Streptomycetales         | Streptomycetaceae      | <i>Streptomyces</i>          |
|------|--------|----------|----------------|---------------------|--------------------------|------------------------|------------------------------|
| Taxa | OTU ID | Kingdom  | Phylum         | Class               | Order                    | Family                 | Genus                        |
|      | 151    | Bacteria | Proteobacteria | Gammaproteobacteria | Unassigned               | Unassigned             | <i>Acidibacter</i>           |
|      | 152    | Bacteria | Acidobacteria  | Acidobacteriia      | Acidobacteriales         | Acidobacteriaceae      | <i>Candidatus Koribacter</i> |
|      | 153    | Bacteria | Actinobacteria | Actinomycetia       | Streptomycetales         | Streptomycetaceae      | <i>Streptomyces</i>          |
|      | 156    | Bacteria | Chloroflexi    | Ktedonobacteria     | Ktedonobacterales        | Thermosporotrichaceae  | <i>Thermosporothrix</i>      |
|      | 160    | Bacteria | Proteobacteria | Gammaproteobacteria | Enterobacterales         | Enterobacteriaceae     | <i>Salmonella</i>            |
|      | 162    | Bacteria | Firmicutes     | Clostridia          | Thermosediminibacterales | Tepidanaerobacteraceae | <i>Biomaiibacter</i>         |
|      | 172    | Bacteria | Proteobacteria | Gammaproteobacteria | Enterobacterales         | Enterobacteriaceae     | Unassigned                   |
|      | 175    | Bacteria | Proteobacteria | Gammaproteobacteria | Enterobacterales         | Enterobacteriaceae     | <i>Salmonella</i>            |
|      | 176    | Bacteria | Acidobacteria  | Acidobacteriia      | Acidobacteriales         | Acidobacteriaceae      | <i>Granulicella</i>          |
|      | 179    | Bacteria | Acidobacteria  | Acidobacteriia      | Acidobacteriales         | Acidobacteriaceae      | <i>Candidatus Koribacter</i> |



|      | 180    | Bacteria | Proteobacteria | Alphaproteobacteria | Rhodospirillales  | Acetobacteraceae   | Unassigned           |
|------|--------|----------|----------------|---------------------|-------------------|--------------------|----------------------|
|      | 182    | Bacteria | Actinobacteria | Actinomycetia       | Frankiales        | Frankiaceae        | <i>Frankia</i>       |
|      | 183    | Bacteria | Proteobacteria | Betaproteobacteria  | Burkholderiales   | Burkholderiaceae   | <i>Caballeronia</i>  |
|      | 184    | Bacteria | Chloroflexi    | Ktedonobacteria     | Ktedonobacterales | Dictyobacteraceae  | <i>Dictyobacter</i>  |
|      | 185    | Bacteria | Proteobacteria | Gammaproteobacteria | Enterobacterales  | Enterobacteriaceae | <i>Klebsiella</i>    |
|      | 186    | Bacteria | Proteobacteria | Gammaproteobacteria | Xanthomonadales   | Rhodanobacteraceae | <i>Dyella</i>        |
|      | 191    | Bacteria | Actinobacteria | Actinomycetia       | Pseudonocardiales | Pseudonocardiaceae | <i>Actinosynnema</i> |
|      | 193    | Bacteria | Proteobacteria | Gammaproteobacteria | Enterobacterales  | Enterobacteriaceae | <i>Cronobacter</i>   |
|      | 195    | Bacteria | Proteobacteria | Gammaproteobacteria | Enterobacterales  | Enterobacteriaceae | <i>Salmonella</i>    |
| Taxa | OTU ID | Kingdom  | Phylum         | Class               | Order             | Family             | Genus                |
|      | 201    | Bacteria | Proteobacteria | Gammaproteobacteria | Xanthomonadales   | Rhodanobacteraceae | <i>Dyella</i>        |
|      | 202    | Bacteria | Proteobacteria | Betaproteobacteria  | Burkholderiales   | Burkholderiaceae   | <i>Ralstonia</i>     |

|     |          |                                |                     |                   |                    |                                 |
|-----|----------|--------------------------------|---------------------|-------------------|--------------------|---------------------------------|
| 205 | Bacteria | Proteobacteria                 | Alphaproteobacteria | Hyphomicrobiales  | Xanthobacteraceae  | <i>Pseudolabrys</i>             |
| 207 | Bacteria | Actinobacteria                 | Actinomycetia       | Streptomycetales  | Streptomycetaceae  | <i>Streptomyces</i>             |
| 211 | Bacteria | Proteobacteria                 | Alphaproteobacteria | Sphingomonadales  | Sphingomonadaceae  | <i>Sphingomonas</i>             |
| 214 | Bacteria | Proteobacteria                 | Gammaproteobacteria | Enterobacterales  | Enterobacteriaceae | <i>Salmonella</i>               |
| 222 | Bacteria | Proteobacteria                 | Gammaproteobacteria | Enterobacterales  | Enterobacteriaceae | Unassigned                      |
| 223 | Bacteria | Candidatus<br>Saccharibacteria | Unassigned          | Unassigned        | Unassigned         | <i>Candidatus Saccharimonas</i> |
| 224 | Bacteria | Chloroflexi                    | Ktedonobacteria     | Ktedonobacterales | Ktedonobacteraceae | <i>Ktedonobacter</i>            |
| 225 | Bacteria | Chloroflexi                    | Ktedonobacteria     | Ktedonobacterales | Dictyobacteraceae  | <i>Dictyobacter</i>             |
| 226 | Bacteria | Proteobacteria                 | Alphaproteobacteria | Rhodospirillales  | Azospirillaceae    | <i>Azospirillum</i>             |
| 232 | Bacteria | Proteobacteria                 | Gammaproteobacteria | Enterobacterales  | Enterobacteriaceae | <i>Cronobacter</i>              |
| 235 | Bacteria | Chloroflexi                    | Ktedonobacteria     | Ktedonobacterales | Dictyobacteraceae  | <i>Dictyobacter</i>             |
| 236 | Bacteria | Candidatus<br>Saccharibacteria | Unassigned          | Unassigned        | Unassigned         | <i>Candidatus Saccharimonas</i> |

|      | 243    | Bacteria | Actinobacteria | Acidimicrobiia      | Acidimicrobiales         | Iamiaceae               | <i>Iamia</i>                |
|------|--------|----------|----------------|---------------------|--------------------------|-------------------------|-----------------------------|
|      | 244    | Bacteria | Chloroflexi    | Ktedonobacteria     | Ktedonobacterales        | Ktedonosporobacteraceae | <i>Ktedonosporobacter</i>   |
|      | 247    | Bacteria | Proteobacteria | Gammaproteobacteria | Enterobacterales         | Enterobacteriaceae      | <i>Cronobacter</i>          |
|      | 248    | Bacteria | Chloroflexi    | Ktedonobacteria     | Ktedonobacterales        | Ktedonobacteraceae      | <i>Ktedonobacter</i>        |
| Taxa | OTU ID | Kingdom  | Phylum         | Class               | Order                    | Family                  | Genus                       |
|      | 254    | Bacteria | Proteobacteria | Gammaproteobacteria | Unassigned               | Unassigned              | <i>Acidibacter</i>          |
|      | 256    | Bacteria | Proteobacteria | Gammaproteobacteria | Enterobacterales         | Enterobacteriaceae      | Unassigned                  |
|      | 259    | Bacteria | Chloroflexi    | Ktedonobacteria     | Ktedonobacterales        | Ktedonosporobacteraceae | <i>Ktedonosporobacter</i>   |
|      | 260    | Bacteria | Proteobacteria | Alphaproteobacteria | Hyphomicrobiales         | Xanthobacteraceae       | <i>Pseudolabrys</i>         |
|      | 264    | Bacteria | Proteobacteria | Gammaproteobacteria | Enterobacterales         | Enterobacteriaceae      | Unassigned                  |
|      | 271    | Bacteria | Firmicutes     | Clostridia          | Eubacteriales            | Peptococcaceae          | <i>Desulfohalotomaculum</i> |
|      | 297    | Bacteria | Firmicutes     | Clostridia          | Thermosediminibacterales | Tepidanaerobacteraceae  | <i>Tepidanaerobacter</i>    |

|     |          |                                |                     |                   |                       |                                 |
|-----|----------|--------------------------------|---------------------|-------------------|-----------------------|---------------------------------|
| 304 | Bacteria | Chloroflexi                    | Ktedonobacteria     | Ktedonobacterales | Ktedonobacteraceae    | <i>Ktedonobacter</i>            |
| 308 | Bacteria | Chloroflexi                    | Ktedonobacteria     | Ktedonobacterales | Thermosporotrichaceae | <i>Thermosporothrix</i>         |
| 309 | Bacteria | Proteobacteria                 | Gammaproteobacteria | Enterobacterales  | Enterobacteriaceae    | <i>Escherichia</i>              |
| 311 | Bacteria | Proteobacteria                 | Gammaproteobacteria | Enterobacterales  | Enterobacteriaceae    | <i>Klebsiella</i>               |
| 312 | Bacteria | Actinobacteria                 | Actinomycetia       | Micromonosporales | Micromonosporaceae    | <i>Actinoplanes</i>             |
| 317 | Bacteria | Candidatus<br>Saccharibacteria | Unassigned          | Unassigned        | Unassigned            | <i>Candidatus Saccharimonas</i> |
| 323 | Bacteria | Unassigned                     | Unassigned          | Unassigned        | Unassigned            | Unassigned                      |
| 324 | Bacteria | Chloroflexi                    | Ktedonobacteria     | Ktedonobacterales | Ktedonobacteraceae    | <i>Ktedonobacter</i>            |
| 325 | Bacteria | Firmicutes                     | Unassigned          | Unassigned        | Unassigned            | Unassigned                      |
| 330 | Bacteria | Firmicutes                     | Clostridia          | Eubacteriales     | Peptococcaceae        | <i>Desulfohalotomaculum</i>     |
| 333 | Bacteria | Acidobacteria                  | Acidobacteriia      | Acidobacteriales  | Acidobacteriaceae     | <i>Occallatibacter</i>          |
| 347 | Bacteria | Proteobacteria                 | Gammaproteobacteria | Pseudomonadales   | Pseudomonadaceae      | <i>Pseudomonas</i>              |

---

| Taxa     | OTU ID | Kingdom  | Phylum         | Class                | Order                  | Family                  | Genus                   |
|----------|--------|----------|----------------|----------------------|------------------------|-------------------------|-------------------------|
|          | 360    | Bacteria | Firmicutes     | Negativicutes        | Selenomonadales        | Sporomusaceae           | <i>Thermosinus</i>      |
|          | 377    | Bacteria | Actinobacteria | Actinomycetia        | Streptomycetales       | Streptomycetaceae       | <i>Streptomyces</i>     |
|          | 393    | Bacteria | Chloroflexi    | Ktedonobacteria      | Ktedonobacterales      | Ktedonobacteraceae      | <i>Ktedonobacter</i>    |
|          | 395    | Bacteria | Proteobacteria | Gamma proteobacteria | Enterobacterales       | Enterobacteriaceae      | Unassigned              |
|          | 401    | Bacteria | Chloroflexi    | Ktedonobacteria      | Unassigned             | Unassigned              | Unassigned              |
|          | 429    | Bacteria | Chloroflexi    | Ktedonobacteria      | Ktedonobacterales      | Ktedonobacteraceae      | <i>Ktedonobacter</i>    |
|          | 481    | Bacteria | Firmicutes     | Clostridia           | Thermoanaerobacterales | Thermoanaerobacteraceae | <i>Thermacetogenium</i> |
|          | 487    | Bacteria | Firmicutes     | Bacilli              | Bacillales             | Thermoactinomycetaceae  | <i>Staphylospora</i>    |
| Rhizobia | 1      | Bacteria | Proteobacteria | Alphaproteobacteria  | Rhizobiales            | Bradyrhizobiaceae       | <i>Bradyrhizobium</i>   |
|          | 2      | Bacteria | Proteobacteria | Alphaproteobacteria  | Rhizobiales            | Phyllobacteriaceae      | <i>Mesorhizobium</i>    |
|          | 13     | Bacteria | Proteobacteria | Alphaproteobacteria  | Rhizobiales            | Phyllobacteriaceae      | <i>Mesorhizobium</i>    |

|      | 14     | Bacteria | Proteobacteria | Alphaproteobacteria | Rhizobiales | Bradyrhizobiaceae  | <i>Bradyrhizobium</i> |
|------|--------|----------|----------------|---------------------|-------------|--------------------|-----------------------|
|      | 18     | Bacteria | Proteobacteria | Alphaproteobacteria | Rhizobiales | Bradyrhizobiaceae  | <i>Bradyrhizobium</i> |
|      | 21     | Bacteria | Proteobacteria | Alphaproteobacteria | Rhizobiales | Bradyrhizobiaceae  | <i>Bradyrhizobium</i> |
|      | 25     | Bacteria | Proteobacteria | Alphaproteobacteria | Rhizobiales | Bradyrhizobiaceae  | <i>Bradyrhizobium</i> |
|      | 35     | Bacteria | Proteobacteria | Alphaproteobacteria | Rhizobiales | Bradyrhizobiaceae  | <i>Bradyrhizobium</i> |
|      | 39     | Bacteria | Proteobacteria | Alphaproteobacteria | Rhizobiales | Bradyrhizobiaceae  | <i>Bradyrhizobium</i> |
|      | 41     | Bacteria | Proteobacteria | Alphaproteobacteria | Rhizobiales | Bradyrhizobiaceae  | <i>Bradyrhizobium</i> |
|      | 49     | Bacteria | Proteobacteria | Alphaproteobacteria | Rhizobiales | Bradyrhizobiaceae  | <i>Bradyrhizobium</i> |
| Taxa | OTU ID | Kingdom  | Phylum         | Class               | Order       | Family             | Genus                 |
|      | 56     | Bacteria | Proteobacteria | Alphaproteobacteria | Rhizobiales | Bradyrhizobiaceae  | <i>Bradyrhizobium</i> |
|      | 74     | Bacteria | Proteobacteria | Alphaproteobacteria | Rhizobiales | Bradyrhizobiaceae  | <i>Bradyrhizobium</i> |
|      | 84     | Bacteria | Proteobacteria | Alphaproteobacteria | Rhizobiales | Phyllobacteriaceae | <i>Mesorhizobium</i>  |

|       |     |           |                |                     |             |                    |                       |
|-------|-----|-----------|----------------|---------------------|-------------|--------------------|-----------------------|
|       | 89  | Bacteria  | Proteobacteria | Alphaproteobacteria | Rhizobiales | Bradyrhizobiaceae  | <i>Bradyrhizobium</i> |
|       | 98  | Bacteria  | Proteobacteria | Alphaproteobacteria | Rhizobiales | Phyllobacteriaceae | <i>Mesorhizobium</i>  |
|       | 112 | Bacteria  | Proteobacteria | Alphaproteobacteria | Rhizobiales | Bradyrhizobiaceae  | <i>Bradyrhizobium</i> |
|       | 114 | Bacteria  | Proteobacteria | Alphaproteobacteria | Rhizobiales | Bradyrhizobiaceae  | <i>Bradyrhizobium</i> |
|       | 168 | Bacteria  | Proteobacteria | Alphaproteobacteria | Rhizobiales | Bradyrhizobiaceae  | <i>Bradyrhizobium</i> |
| <hr/> |     |           |                |                     |             |                    |                       |
| Fungi | 1   | Eukaryota | Ascomycota     | Sordariomycetes     | Sordariales | Chaetomiaceae      | <i>Chaetomium</i>     |
|       | 3   | Eukaryota | Ascomycota     | Eurotiomycetes      | Eurotiales  | Aspergillaceae     | <i>Aspergillus</i>    |
|       | 5   | Eukaryota | Ascomycota     | Eurotiomycetes      | Eurotiales  | Aspergillaceae     | <i>Penicillium</i>    |
|       | 6   | Eukaryota | Ascomycota     | Sordariomycetes     | Hypocreales | Nectriaceae        | <i>Fusarium</i>       |
|       | 8   | Eukaryota | Ascomycota     | Eurotiomycetes      | Eurotiales  | Aspergillaceae     | <i>Aspergillus</i>    |
|       | 9   | Eukaryota | Ascomycota     | Sordariomycetes     | Hypocreales | Nectriaceae        | <i>Fusarium</i>       |
|       | 10  | Eukaryota | Ascomycota     | Sordariomycetes     | Hypocreales | Bionectriaceae     | <i>Clonostachys</i>   |

|      | 13     | Eukaryota | Ascomycota      | Eurotiomycetes   | Eurotiales      | Aspergillaceae      | <i>Aspergillus</i>  |
|------|--------|-----------|-----------------|------------------|-----------------|---------------------|---------------------|
|      | 23     | Eukaryota | Chytridiomycota | Chytridiomycetes | Rhizophydiales  | Terramycetaceae     | <i>Boothiomyces</i> |
|      | 28     | Eukaryota | Ascomycota      | Sordariomycetes  | Sordariales     | Chaetomiaceae       | <i>Chaetomium</i>   |
|      | 34     | Eukaryota | Ascomycota      | Eurotiomycetes   | Chaetothyriales | Herpotrichiellaceae | <i>Exophiala</i>    |
| Taxa | OTU ID | Kingdom   | Phylum          | Class            | Order           | Family              | Genus               |
|      | 35     | Eukaryota | Ascomycota      | Sordariomycetes  | Sordariales     | Chaetomiaceae       | <i>Chaetomium</i>   |
|      | 36     | Eukaryota | Ascomycota      | Eurotiomycetes   | Chaetothyriales | Herpotrichiellaceae | <i>Coniosporium</i> |
|      | 38     | Eukaryota | Ascomycota      | Dothideomycetes  | Pleosporales    | Pleosporaceae       | <i>Curvularia</i>   |
|      | 40     | Eukaryota | Ascomycota      | Eurotiomycetes   | Eurotiales      | Aspergillaceae      | <i>Aspergillus</i>  |
|      | 42     | Eukaryota | Ascomycota      | Dothideomycetes  | Pleosporales    | Pleosporaceae       | <i>Curvularia</i>   |



Table S4: Ecological cluster 1.

| Taxa     | OTU ID | Kingdom  | Phylum         | Class               | Order                    | Family                 | Genus                        |
|----------|--------|----------|----------------|---------------------|--------------------------|------------------------|------------------------------|
| Bacteria | 9      | Bacteria | Actinobacteria | Actinomycetia       | Streptomycetales         | Streptomycetaceae      | <i>Streptomyces</i>          |
|          | 10     | Bacteria | Chloroflexi    | Ktedonobacteria     | Ktedonobacterales        | Dictyobacteraceae      | <i>Dictyobacter</i>          |
|          | 11     | Bacteria | Chloroflexi    | Ktedonobacteria     | Ktedonobacterales        | Dictyobacteraceae      | <i>Tengunoibacter</i>        |
|          | 13     | Bacteria | Actinobacteria | Actinomycetia       | Streptomycetales         | Streptomycetaceae      | <i>Streptomyces</i>          |
|          | 16     | Bacteria | Proteobacteria | Gammaproteobacteria | Enterobacterales         | Enterobacteriaceae     | Unassigned                   |
|          | 18     | Bacteria | Firmicutes     | Clostridia          | Thermosediminibacterales | Tepidanaerobacteraceae | <i>Tepidanaerobacter</i>     |
|          | 25     | Bacteria | Proteobacteria | Alphaproteobacteria | Sphingomonadales         | Sphingomonadaceae      | <i>Sphingomonas</i>          |
|          | 29     | Bacteria | Acidobacteria  | Acidobacteriia      | Acidobacteriales         | Acidobacteriaceae      | <i>Candidatus Koribacter</i> |
|          | 38     | Bacteria | Actinobacteria | Actinomycetia       | Corynebacterales         | Mycobacteriaceae       | <i>Mycobacterium</i>         |
|          | 45     | Bacteria | Proteobacteria | Gammaproteobacteria | Enterobacterales         | Enterobacteriaceae     | <i>Escherichia</i>           |

| 50   | Bacteria | Chloroflexi    | Ktedonobacteria | Ktedonobacterales | Dictyobacteraceae  | <i>Dictyobacter</i>            |       |
|------|----------|----------------|-----------------|-------------------|--------------------|--------------------------------|-------|
| 62   | Bacteria | Chloroflexi    | Ktedonobacteria | Ktedonobacterales | Ktedonobacteraceae | <i>Ktedonobacter</i>           |       |
| 68   | Bacteria | Firmicutes     | Clostridia      | Eubacteriales     | Peptococcaceae     | <i>Candidatus Desulforudis</i> |       |
| 69   | Bacteria | Acidobacteria  | Acidobacteriia  | Acidobacteriales  | Acidobacteriaceae  | <i>Granulicella</i>            |       |
| 72   | Bacteria | Chloroflexi    | Ktedonobacteria | Ktedonobacterales | Ktedonobacteraceae | <i>Ktedonobacter</i>           |       |
| 73   | Bacteria | Actinobacteria | Actinomycetia   | Streptomycetales  | Streptomycetaceae  | <i>Streptomyces</i>            |       |
| 78   | Bacteria | Firmicutes     | Clostridia      | Eubacteriales     | Unassigned         | Unassigned                     |       |
| 81   | Bacteria | Actinobacteria | Actinomycetia   | Catenulisporales  | Actinospicaceae    | <i>Actinospica</i>             |       |
| Taxa | OTU ID   | Kingdom        | Phylum          | Class             | Order              | Family                         | Genus |
| 83   | Bacteria | Actinobacteria | Actinomycetia   | Streptomycetales  | Streptomycetaceae  | <i>Streptomyces</i>            |       |
| 94   | Bacteria | Bacteroidetes  | Chitinophagia   | Chitinophagales   | Chitinophagaceae   | <i>Sediminibacterium</i>       |       |
| 102  | Bacteria | Acidobacteria  | Acidobacteriia  | Acidobacteriales  | Acidobacteriaceae  | <i>Candidatus Koribacter</i>   |       |

|     |          |                |                     |                   |                         |                              |
|-----|----------|----------------|---------------------|-------------------|-------------------------|------------------------------|
| 103 | Bacteria | Acidobacteria  | Acidobacteriia      | Acidobacteriales  | Acidobacteriaceae       | <i>Candidatus Koribacter</i> |
| 110 | Bacteria | Actinobacteria | Actinomycetia       | Streptomycetales  | Streptomycetaceae       | <i>Streptomyces</i>          |
| 120 | Bacteria | Firmicutes     | Clostridia          | Eubacteriales     | Peptococcaceae          | <i>Pelotomaculum</i>         |
| 121 | Bacteria | Proteobacteria | Gammaproteobacteria | Enterobacterales  | Enterobacteriaceae      | <i>Klebsiella</i>            |
| 122 | Bacteria | Chloroflexi    | Ktedonobacteria     | Ktedonobacterales | Ktedonobacteraceae      | <i>Ktedonobacter</i>         |
| 132 | Bacteria | Firmicutes     | Clostridia          | Eubacteriales     | Peptococcaceae          | <i>Desulfohalotomaculum</i>  |
| 134 | Bacteria | Chloroflexi    | Ktedonobacteria     | Ktedonobacterales | Ktedonosporobacteraceae | <i>Ktedonosporobacter</i>    |
| 136 | Bacteria | Chloroflexi    | Ktedonobacteria     | Ktedonobacterales | Ktedonobacteraceae      | <i>Ktedonobacter</i>         |
| 140 | Bacteria | Chloroflexi    | Ktedonobacteria     | Ktedonobacterales | Ktedonobacteraceae      | <i>Ktedonobacter</i>         |
| 141 | Bacteria | Chloroflexi    | Ktedonobacteria     | Ktedonobacterales | Ktedonobacteraceae      | <i>Ktedonobacter</i>         |
| 148 | Bacteria | Chloroflexi    | Ktedonobacteria     | Ktedonobacterales | Dictyobacteraceae       | <i>Tengunoibacter</i>        |
| 150 | Bacteria | Actinobacteria | Actinomycetia       | Streptomycetales  | Streptomycetaceae       | <i>Streptomyces</i>          |

|      | 156    | Bacteria | Chloroflexi    | Ktedonobacteria     | Ktedonobacterales        | Thermosporotrichaceae   | <i>Thermosporothrix</i>      |
|------|--------|----------|----------------|---------------------|--------------------------|-------------------------|------------------------------|
|      | 162    | Bacteria | Firmicutes     | Clostridia          | Thermosediminibacterales | Tepidanaerobacteraceae  | <i>Biomaiibacter</i>         |
|      | 179    | Bacteria | Acidobacteria  | Acidobacteriia      | Acidobacteriales         | Acidobacteriaceae       | <i>Candidatus Koribacter</i> |
|      | 184    | Bacteria | Chloroflexi    | Ktedonobacteria     | Ktedonobacterales        | Dictyobacteraceae       | <i>Dictyobacter</i>          |
| Taxa | OTU ID | Kingdom  | Phylum         | Class               | Order                    | Family                  | Genus                        |
|      | 185    | Bacteria | Proteobacteria | Gammaproteobacteria | Enterobacterales         | Enterobacteriaceae      | <i>Klebsiella</i>            |
|      | 222    | Bacteria | Proteobacteria | Gammaproteobacteria | Enterobacterales         | Enterobacteriaceae      | Unassigned                   |
|      | 225    | Bacteria | Chloroflexi    | Ktedonobacteria     | Ktedonobacterales        | Dictyobacteraceae       | <i>Dictyobacter</i>          |
|      | 235    | Bacteria | Chloroflexi    | Ktedonobacteria     | Ktedonobacterales        | Dictyobacteraceae       | <i>Dictyobacter</i>          |
|      | 244    | Bacteria | Chloroflexi    | Ktedonobacteria     | Ktedonobacterales        | Ktedonosporobacteraceae | <i>Ktedonosporobacter</i>    |
|      | 259    | Bacteria | Chloroflexi    | Ktedonobacteria     | Ktedonobacterales        | Ktedonosporobacteraceae | <i>Ktedonosporobacter</i>    |
|      | 304    | Bacteria | Chloroflexi    | Ktedonobacteria     | Ktedonobacterales        | Ktedonobacteraceae      | <i>Ktedonobacter</i>         |

|          |     |           |                 |                     |                   |                        |                             |
|----------|-----|-----------|-----------------|---------------------|-------------------|------------------------|-----------------------------|
|          | 323 | Bacteria  | Unassigned      | Unassigned          | Unassigned        | Unassigned             | Unassigned                  |
|          | 330 | Bacteria  | Firmicutes      | Clostridia          | Eubacteriales     | Peptococcaceae         | <i>Desulfohalotomaculum</i> |
|          | 429 | Bacteria  | Chloroflexi     | Ktedonobacteria     | Ktedonobacterales | Ktedonobacteraceae     | <i>Ktedonobacter</i>        |
|          | 487 | Bacteria  | Firmicutes      | Bacilli             | Bacillales        | Thermoactinomycetaceae | <i>Staphylospora</i>        |
| Rhizobia | 2   | Bacteria  | Proteobacteria  | Alphaproteobacteria | Rhizobiales       | Phyllobacteriaceae     | <i>Mesorhizobium</i>        |
|          | 18  | Bacteria  | Proteobacteria  | Alphaproteobacteria | Rhizobiales       | Bradyrhizobiaceae      | <i>Bradyrhizobium</i>       |
|          | 84  | Bacteria  | Proteobacteria  | Alphaproteobacteria | Rhizobiales       | Phyllobacteriaceae     | <i>Mesorhizobium</i>        |
|          | 98  | Bacteria  | Proteobacteria  | Alphaproteobacteria | Rhizobiales       | Phyllobacteriaceae     | <i>Mesorhizobium</i>        |
| Fungi    | 3   | Eukaryota | Ascomycota      | Eurotiomycetes      | Eurotiales        | Aspergillaceae         | <i>Aspergillus</i>          |
|          | 10  | Eukaryota | Ascomycota      | Sordariomycetes     | Hypocreales       | Bionectriaceae         | <i>Clonostachys</i>         |
|          | 23  | Eukaryota | Chytridiomycota | Chytridiomycetes    | Rhizophydiales    | Terramycetaceae        | <i>Boothiomycetes</i>       |
|          | 35  | Eukaryota | Ascomycota      | Sordariomycetes     | Sordariales       | Chaetomiaceae          | <i>Chaetomium</i>           |

| Taxa | OTU ID | Kingdom   | Phylum     | Class           | Order        | Family        | Genus             |
|------|--------|-----------|------------|-----------------|--------------|---------------|-------------------|
|      | 38     | Eukaryota | Ascomycota | Dothideomycetes | Pleosporales | Pleosporaceae | <i>Curvularia</i> |
